# Supplementary material for: Autoreactivity of Broadly Neutralizing Influenza Human Antibodies to Human Tissues and Human Proteins
Source: PubMed Central journal article supplement (PMC7600923; doi:10.3390/v12101140), 2020-10-08
Supplement: viruses-12-01140-s001.pdf [file viruses-12-01140-s001.pdf]

**Table S1: List of host proteins reactive to influenza bNAbs in ProtoArrays**

| <b>Protein</b> |                                                                      |
|----------------|----------------------------------------------------------------------|
| 1              | N-acylaminoacyl-peptide hydrolase (APEH)                             |
| 2              | Enhancer of mRNA decapping 3 homolog ( <i>S. cerevisiae</i> ) (EDC3) |
| 3              | Serine/threonine/tyrosine interacting protein (STYX)                 |
| 4              | Tripartite motif-containing 21 (TRIM21)                              |
| 5              | Signal transducer and activator of transcription 4 (STAT4)           |
| 6              | Mitogen-activated protein kinase 6 (MAPK6)                           |
| 7              | JO-1                                                                 |
| 8              | Thyroglobulin                                                        |

**Table S2: Signal binding ratio of representative bNAbs relative to control 151K signal in IgG depleted human sera in ProtoArray.**

---

| <b>PROTEIN</b> | <b>C6261</b> | <b>C8020</b> | <b>F10</b> |
|----------------|--------------|--------------|------------|
| STAT4          | 681.96       | 222.41       | 2.05       |
| APEH           | 503.80       | 1.64         | 1.41       |
| EDC3           | 221.14       | 2.41         | 1.22       |
| TRIM21         | 2.37         | 2.37         | 2.19       |
| BIRC8          | 4.66         | 122.51       | 1.65       |
| STYX           | 2.70         | 182.46       | 1.63       |

**Table S3: Competition of host proteins with Influenza HA binding to bNAbs**

|                      | C6261 | CR8020 | C9114 | F10  | FI6  | C179 | CH65 |
|----------------------|-------|--------|-------|------|------|------|------|
|                      | %H1   | %H3    | %H1   | %H1  | %H1  | %H1  | %H1  |
| <b>APEH</b>          | 100   | 100    | 99.3  | 100  | 100  | 99.7 | 98.9 |
| <b>TRIM21</b>        | 100   | 99.2   | 100   | 100  | 100  | 96.3 | 100  |
| <b>EDC3</b>          | 23.1  | 99.3   | 93.3  | 99.8 | 92.9 | 97.8 | 100  |
| <b>STYX</b>          | 100   | 96.7   | 95.8  | 100  | 100  | 99.9 | 100  |
| <b>STAT4</b>         | 100   | 100    | 98.1  | 100  | 91.6 | 89.6 | 90   |
| <b>MAPK6</b>         | 100   | 93.9   | 97.2  | 100  | 100  | 92.6 | 94.5 |
| <b>JO-1</b>          | 95.4  | 94.5   | 87.3  | 88.7 | 96.2 | 92.2 | 98.5 |
| <b>Thyroglobulin</b> | 99.2  | 100    | 93    | 100  | 99.6 | 94.4 | 94.9 |

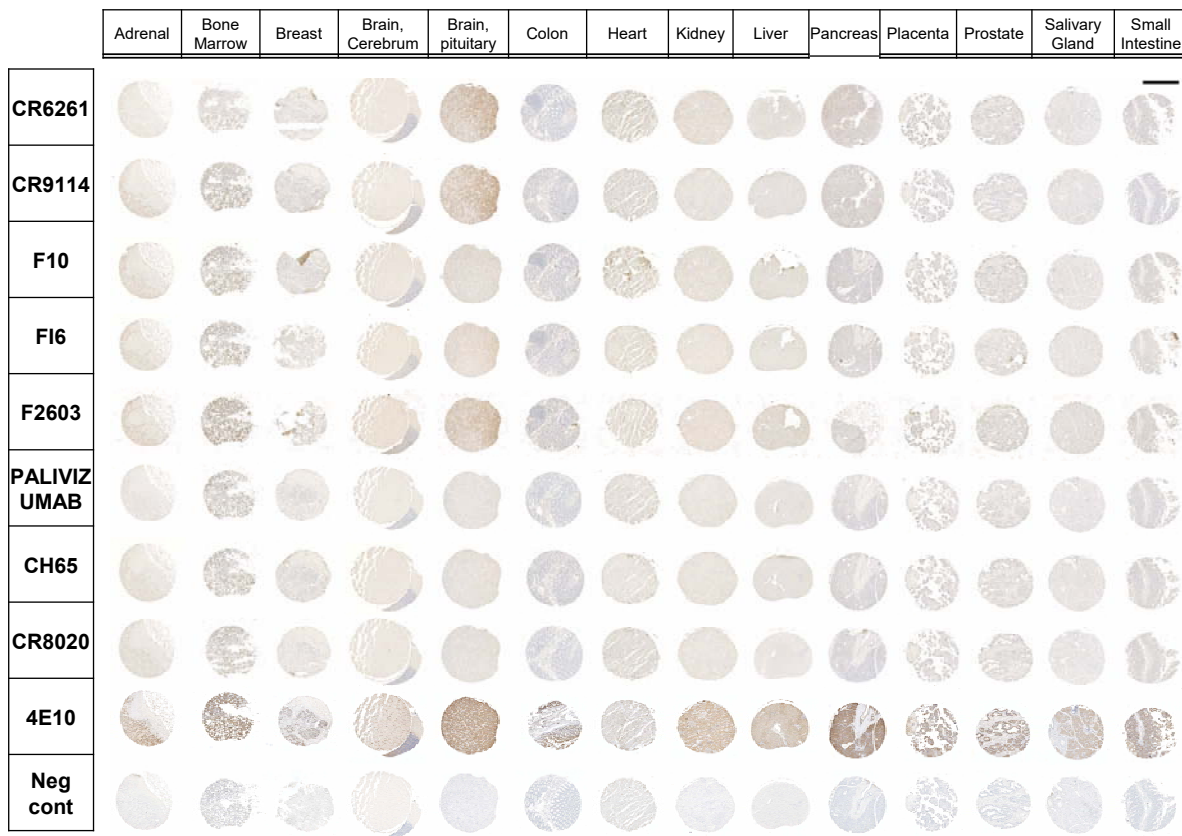

**Supplementary figure 1.** Representative binding images of each bNAb to normal human tissues. Scales indicates 1 mm.

10            20            30            40            50            60  
 .....|.....|.....|.....|.....|.....|.....|.....|.....|.....|.....|.....|  
 MATDWLGSIVSINCGDSLGVYQGRVSAVDQVSQTISLTRPFHNGVKCLVPEVTFRAGDIT

70            80            90            100           110           120  
 .....|.....|.....|.....|.....|.....|.....|.....|.....|.....|.....|.....|  
 ELKILEIPGPGDNQHFGLHQTELGPSGAGCQVGINQNGTGKFKVPASSSSAPQNIPIKR

130           140           150           160           170           180  
 .....|.....|.....|.....|.....|.....|.....|.....|.....|.....|.....|.....|  
 TDVKSQDVAVSPQQQCSKSYVDRHMELSQSFSFRRHNSWSSSRHPNQATPKKSGLK

190           200           210           220           230           240  
 .....|.....|.....|.....|.....|.....|.....|.....|.....|.....|.....|.....|  
 NGQMKNKDDECFGDDIEEIPDIDFDIEGNLALFDKAAVFEEIDTYERRSGTRSRGIPNER

250           260           270           280           290           300  
 .....|.....|.....|.....|.....|.....|.....|.....|.....|.....|.....|.....|  
 PTRYRHDENIIESEPIVYRRIIVPHNVSKEFCDSGLVVPSSISYELHKKLLSVAEKHGLT

310           320           330           340           350           360  
 .....|.....|.....|.....|.....|.....|.....|.....|.....|.....|.....|.....|  
 LERRLEMTGVCASQMALTLGGPNRLNPKNVHQRPTVALLCGPHVKGAGQISCGRHLANH

370           380           390           400           410           420  
 .....|.....|.....|.....|.....|.....|.....|.....|.....|.....|.....|.....|  
 DVQVILFLPNFVKMLE SITNELSLFSKTQGGVSSLKDLPTSPVDLVINCLDCPENVFLR

430           440           450           460           470           480  
 .....|.....|.....|.....|.....|.....|.....|.....|.....|.....|.....|.....|  
 DQPWYKAAVAWANQNRA PVLSIDPPVHEVEQGIDAKWSLALGLPLPLGEGHAGRIYLCDIG

490           500  
 .....|.....|.....|.....|.....|.....|.....|.....|.....|.....|.....|.....|  
 IPQQVFQEVGINYHSPFGCKFVIPLHSA

**Supplementary figure 2: Sequence of human EDC3 with residues highlighted that potentially mimic contact site for HA binding with bNAb CR6261. The residues shaded in yellow, cyan and green are shown in similar colors in Figure 1D.**
